# **Methylation Data Processing Protocol & Comparison of Blood and Cerebral Spinal Fluid Following Aneurysmal Subarachnoid Hemorrhage**

**Annie I. Arockiaraj<sup>1</sup>, Dongjing Liu<sup>1</sup>, John R. Shaffer<sup>1,2</sup>, Theresa A. Koleck<sup>#</sup>, Elizabeth A. Crago<sup>%</sup>, Daniel E. Weeks<sup>1,\$</sup>, Yvette P. Conley<sup>1,%</sup>**

1. Department of Human Genetics, Graduate School of Public Health, University of Pittsburgh, Pittsburgh, PA, USA

2. Center for Craniofacial and Dental Genetics, Department of Oral Biology, School of Dental Medicine, University of Pittsburgh, Pittsburgh, PA, USA

\$. Department of Biostatistics, Graduate School of Public Health, University of Pittsburgh, Pittsburgh, PA, USA

#. School of Nursing, Columbia University, New York, NY, USA

%. School of Nursing, University of Pittsburgh, Pittsburgh, PA, USA

## **\* Correspondence:**

Yvette P. Conley  
University of Pittsburgh  
3500 Victoria Street  
440 Victoria Building  
Pittsburgh, PA 15213  
[yconley@pitt.edu](mailto:yconley@pitt.edu)

## **Running Title**

Methylomics profile for aSAH

**Keywords:** epigenome-wide association study (EWAS), methylation, methylomics, aneurysmal subarachnoid hemorrhage (aSAH), epigenetics.

## Abstract

1 One challenge in conducting DNA methylation-based epigenome-wide association studies  
2 (EWAS) is the appropriate cleaning and quality-checking of the methylation values to minimize  
3 biases and experimental artifacts, while simultaneously retaining potential biological signals.  
4 These issues are compounded in studies that include multiple tissue types, and/or tissues for which  
5 reference data are unavailable to assist in adjusting for cell-type mixture, for example cerebral  
6 spinal fluid (CSF). For our study that evaluated blood and CSF taken from aneurysmal  
7 subarachnoid hemorrhage (aSAH) patients, we developed a protocol to clean and quality-check  
8 genome-wide methylation levels and compared the methylomic profiles of the two tissues to  
9 determine whether blood is a suitable surrogate for CSF. CSF samples were collected from 279  
10 aSAH patients longitudinally during the first 14 days of hospitalization, and a subset of 88 of these  
11 patients also provided blood samples within the first two days. Quality control (QC) procedures  
12 included identification and exclusion of poor performing samples and low-quality probes,  
13 functional normalization, and correction for cell-type heterogeneity via surrogate variable analysis  
14 (SVA). Significant differences in rates of poor sample performance was observed between blood  
15 (1.1% failing QC) and CSF (9.12% failing QC;  $p = 0.003$ ). Functional normalization increased the  
16 concordance of methylation values among technical replicates in both CSF and blood. Likewise,  
17 SVA improved the asymptotic behavior of the test of association in a simulated EWAS under the  
18 null hypothesis. To determine the suitability of blood as a surrogate for CSF, we calculated the  
19 correlation of adjusted methylation values between blood and CSF globally and by genomic  
20 regions. Overall, mean correlation ( $r < 0.26$ ) was low, suggesting that blood is not a suitable  
21 surrogate for global methylation in CSF. However, differences in the magnitude of the correlation  
22 were observed by genomic region (CpG island, shore, shelf, open sea;  $p < 0.001$  for all) and  
23 orientation with respect to nearby genes (3' UTR, transcription start site, exon, body, 5' UTR;  $p <$   
24  $0.01$  for all). In conclusion, the correlation analysis and QC pipelines indicated that DNA extracted  
25 from blood was not, overall, a suitable surrogate for DNA extracted from CSF in aSAH  
26 methylomic studies.

## 1 **1 Introduction**

2           The epigenome-wide association study (EWAS) approach has emerged in recent years as  
3 a hypothesis-free method for investigating the associations between epigenetic marks, such as  
4 DNA methylation, and human phenotypes. Challenges pertaining to the cleaning and processing  
5 of methylomic data persist, including issues related to sample quality, controlling for cell type  
6 heterogeneity, comparing methylomic profiles across tissue types, and modeling dynamic  
7 changes in methylation over time. Here, we describe our quality control (QC) pipeline for  
8 processing and quality-checking genome-wide methylation data obtained from samples of blood  
9 and cerebral spinal fluid (CSF) in a cohort of acute subarachnoid hemorrhage (aSAH) patients.  
10 aSAH is a form of stroke leading to variation in clinical outcomes such as cerebral vasospasm,  
11 coma, delayed cerebral ischemia (DCI), cognitive decline, and death (Wermer et al. 2007).  
12 Previous work (Endres et al. 2000; Nelson, Kavalali, and Monteggia 2008; Stapels et al. 2010)  
13 has suggested that changes in DNA methylation occur following aSAH. We hypothesize that  
14 these methylomic changes may be clinically relevant. Therefore, the overarching goal of this  
15 ongoing initiative is to understand the changes in methylomic profiles occurring after aSAH to  
16 identify biomarkers predictive of prognosis and recovery outcomes. The purpose of this specific  
17 study was to develop and implement a pipeline for cleaning and quality-checking methylomic  
18 profiles derived from CSF tissue and to determine the suitability of peripheral blood as a  
19 surrogate for CSF.

20

## 21 **2 Materials and Methods**

22

### 23 **2.1 Study Design Overview**

24           Our study population is comprised of individuals who have sustained an aSAH. Patient  
25 DNA was obtained from two biological tissues, CSF (drained as standard of care) and blood. This  
26 study investigated CSF samples collected longitudinally from 279 patients during the first 14 days  
27 of hospitalization, and blood samples from 88 of these individuals collected within the first day of  
28 hospitalization. Methylomic profiles were obtained using a genome-wide array, from which  
29 methylation levels, quantified as beta-values (i.e., percent methylation) and M-values (i.e., a  
30 transformation of the beta-values, which exhibit beneficial properties for statistical analysis), were  
31 assessed for over 450,000 cytosine-phosphate-guanine (CpG) sites. QC analyses of methylation

1 data were performed in the R statistical computing environment using the following packages:  
2 minfi (Aryee et al. 2014), ENmix (Xu et al. 2016) and sva (Leek et al. 2012). After QC, cleaned  
3 methylomic profiles were contrasted between blood and CSF samples to determine the utility of  
4 blood as surrogate for CSF.

5

## 6 **2.2 Patient Recruitment and Sample Collection**

7 Participants were considered for this study if they were admitted to the University of  
8 Pittsburgh Medical Center Neurovascular Intensive Care Unit with an aSAH confirmed by digital  
9 subtracted cerebral angiography and/or head computed tomography (CT) and a Fisher grade  
10 (measure of hemorrhage burden) > 1. Informed consent was obtained from the participant or their  
11 legal proxy using a protocol approved by the University of Pittsburgh Institutional Review Board.  
12 Exclusion criteria included a history of debilitating neurologic disease or subarachnoid  
13 hemorrhage due to arteriovenous malformation, trauma, or mycotic aneurysm.

14 Daily CSF samples were collected for the first 14 days after aSAH from an external  
15 ventricular drain placed as standard of care and DNA extracted using the Qiamp Midi kit (Qiagen,  
16 Valencia, CA, USA). Venous blood was collected within the first day of hospitalization and DNA  
17 was extracted using a simple salting out procedure. All DNA was stored in 1X TE buffer at 4°C.

18 This study included 279 aSAH patients. For the CSF samples, we targeted days 1, 4, 7, 10,  
19 and 13 post-aSAH, and substituted samples +/- 1 day when target days were unavailable. Blood  
20 samples collected within the first day of hospitalization after aSAH were included in this study for  
21 88 of the 279 participants.

22

### 23 **2.2.1 Potential Covariate Assessments**

24 The severity of aSAH was assessed by Fisher grade (Fisher, Kistler, and Davis 1980)  
25 employing CT scan to assess hemorrhage burden and by Hunt and Hess scores (Hunt and Hess  
26 1968) to assess symptom burden. Demographic and anthropometric characteristics such as age,  
27 sex, race, height, and weight were collected from medical records (Table 1). Smoking status was  
28 also collected.

29

## 1 **2.3 DNA Methylation Data Collection and Plate Design**

2 The Illumina (San Diego, CA) Infinium HumanMethylation450 BeadChip platform was  
3 used to assess the methylation levels at over 450,000 CpG sites in the samples. Methylation data  
4 collection was performed by the Center for Inherited Disease Research (CIDR) of Johns Hopkins  
5 University. Each BeadChip, hereafter referred to as a plate, consists of eight chips of 12 samples  
6 arranged in a layout of six rows by two columns. This enables 96 samples to be run on a single  
7 plate. To avoid plate effects, all blood samples were assayed together on a single plate. CSF  
8 samples were placed across 11 plates using several strategies to reduce the impact of technical  
9 artifacts. First, all longitudinal samples from the same patient were included on the same chip  
10 within the same plate so that longitudinal changes in methylation were not obscured by chip and  
11 plate effects. Second, row and column positioning of samples from the same patient were carefully  
12 assigned to available positions within a chip so that longitudinal changes in methylation were not  
13 confounded with row and column effects. Third, cases and controls for DCI were balanced within  
14 chips using a checkerboard pattern so that DCI was not confounded with row, column, chip, or  
15 plate effects (see Supplemental Figure 1 for the plate map). To gauge technical variation, we  
16 included four control samples of fixed methylation state (0%, 30%, 70%, and 100% methylated)  
17 and four technical replicates (i.e., repeated assays of the same DNA sample) per plate. Two of the  
18 control samples were placed in the same position across all plates and two were randomly placed.  
19 For the plate of blood samples, all four technical replicates were randomly positioned duplicates.  
20 In contrast, for the 11 plates of CSF samples, three of the four technical replicates were randomly  
21 chosen duplicate samples, and one was the same sample replicated across all 11 plates.

22

## 23 **2.4 Sample Quality Functional Normalization**

24 ENmix (Xu et al. 2016) was employed to assess the quality of samples in our methylation  
25 study, separately for blood and CSF samples. Samples having bisulphite control intensities less  
26 than 3 standard deviations below the mean of all samples, and/or for which more than 1% of probes  
27 were inadequately detected (i.e., detection p-values  $> 0.01$  or with fewer than 3 beads) were  
28 categorized as low-quality samples. These, along with outliers in total intensity or beta value  
29 distribution were removed from our subsequent analyses (Xu et al. 2016). After the removal of  
30 low-quality and outlier samples, we performed background correction (Xu et al. 2016) to remove  
31 non-specific signals from the total signal, and performed dye bias correction (Xu et al. 2017).

1 Sample quality differences by tissue type were tested using Fisher's exact test on counts of samples  
2 passing or failing all sample QC filters.

3 We normalized the methylation data to bring Infinium Type I and Type II probes into  
4 alignment and to reduce noise and technical variation due to batch effects (i.e., plate, chip, row,  
5 and column effects). Specifically, we performed functional normalization, an extension of quantile  
6 normalization, which makes use of the control probes on the array to regress out unwanted  
7 variation in the methylation data (Fortin et al. 2014). Whether functional normalization improved  
8 agreement between technical replicates was tested by comparing the squared differences in median  
9 M-values between technical duplicates before and after normalization using a one-sided paired t-  
10 test.

11

## 12 **2.5 CpG Site-Level Quality Control**

13 After normalizing the data, we removed CpG sites from our analysis due to: (1) overlap of  
14 methylation probes with known polymorphic sites (which can cause biased methylation  
15 assessments), (2) probes located on the sex chromosomes (to rectify the artifacts arising due to  
16 unequal distribution of gender in the data) (Marabita et al. 2013), (3) cross-reactive probes that  
17 bind to alternate genomic sequences, (4) probes exhibiting multi-modal distributions indicative of  
18 poor quality or bias (Xu et al. 2016) and (5) probes that were inadequately detected (i.e., detection  
19 p-values  $> 0.01$  or with fewer than 3 beads) in more than 1% of samples. Differences in the number  
20 of CpGs passing quality filters was tested using McNemar's test.

21

## 22 **2.6 Reference Based Cell Proportions for Blood**

23 Blood has a mixture of cell types and DNA methylation-based references have been  
24 established for blood cells. Therefore, to estimate the proportions (cell counts) of each cell type,  
25 we employed Houseman's reference based method (Houseman et al. 2012) using the functions  
26 available in the minfi package (Aryee et al. 2014) in our blood data. The method is based on using  
27 DNA methylation as a surrogate measure for cell type distributions and outputs the proportion of  
28 cell types: CD4+ T cells, CD8+ T cells, natural killer cells, monocytes, B -cells and granulocytes  
29 in each sample. The proportion of all cell types equals to one for each sample.

30

## 1 **2.7 Cell-Type Heterogeneity Correction and Simulated EWAS Under the Null Hypothesis**

2 Owing to the lack of reference methylation data for cell types found in CSF after an aSAH  
3 event we employed surrogate variable analysis (SVA) to perform reference-free adjustment for  
4 cell-type heterogeneity across the samples in blood and CSF data. SVA, as implemented in the sva  
5 R package (Leek et al. 2012), simultaneously models the effects of known sources of variation  
6 (covariates) and unknown sources of variation (i.e., surrogate variables), conditional on a  
7 phenotype of interest. Including the phenotype of interest in this modeling approach is necessary  
8 to prevent the surrogate variables from accounting for variation due to, for example, differences  
9 between cases and controls of disease, so as not to stymie subsequent analyses aimed at detecting  
10 CpG sites associated with case/control status. For examining the utility of surrogate variables in  
11 adjusting for cell-type heterogeneity in the absence of any particular phenotype-specific analyses,  
12 we generated a random trait by randomly permuting one of our observed traits, DCI, to serve as  
13 our outcome of interest. SVA was performed for this simulated trait along with age and gender as  
14 covariates in the context of an EWAS, whereby each CpG was individually tested for association  
15 with the simulated trait. Given the repeated measures in CSF, we grouped the CSF samples into  
16 five subsets centered on their target days (days 1, 4, 7, 10 and 13) and substituted samples +/- 1  
17 day when a sample on the target day was unavailable. The goal of performing SVA cross-  
18 sectionally in CSF subsets is to retain the variation in methylation related to time. EWAS was also  
19 performed for the simulated trait without adjusting for surrogate variables and the distribution of  
20 p-values for SVA-adjusted and unadjusted EWAS scans under the null hypothesis were  
21 qualitatively compared to determine effect of SVA on genomic inflation. We measured  
22 inflation/deflation using the genomic inflation factor ( $\lambda$ ), which is defined as the ratio of the  
23 empirically observed to expected median of the distribution of the test statistic.

24

## 25 **2.8 Comparisons of Blood and CSF Methylation Profiles**

26 We compared the methylation profiles of individuals with blood samples collected within  
27 the first day after hospitalization and CSF samples collected at day 1, 4, 7, 10 and 13. We used 65,  
28 64, 65, 61 and 47 subjects to compare the methylation profiles of blood and CSF at day 1, day 4,  
29 day 7, day 10 and day 13 respectively to facilitate individual level comparison. For this  
30 comparison, we excluded CpG sites with a methylation beta value less than 10% or greater than  
31 90% from all CpGs that passed QC, as methylation at these sites had little variation across samples

1 and would not be informative for the analysis. The M-values at each qualifying CpG site were  
2 adjusted for age, sex and the surrogate variables using the aforementioned random trait to remove  
3 unwanted variation, and were then used to calculate correlation coefficients between the blood and  
4 CSF profile.

5

### 6 **3 Results**

7

#### 8 **3.1 Sample-level Quality Control**

9 A total of 1,012 methylation profiles (including 44 technical replicates) were measured  
10 from CSF samples collected longitudinally from 279 aSAH patients. Additionally, 92 methylation  
11 profiles (including 4 technical replicates) were measured on blood samples in a subset of 88 of  
12 these patients; the majority of these blood samples (77) were sampled between zero and two days  
13 post-hospitalization (Table S1). QC analyses and filtering procedures were performed separately  
14 for CSF and blood samples. Based on low average bisulphite intensity and/or high proportion of  
15 poorly detected probes, we identified 89 (of 1012; 8.8%) poorly performing CSF samples (Figure  
16 1). Additionally, we identified 3 (0.3%) more CSF outliers based on low total intensity. In contrast,  
17 no blood samples (0 of 92; 0%) failed these criteria. Figure 2 displays the beta-value distributions  
18 of all samples collected, based on which one blood and one additional CSF samples were identified  
19 as outliers. In total, poor sample performance was more common for CSF (93 of 1,012, 9.1%) than  
20 for blood (1 of 92, 1.1%), and these differences in quality of methylomic profiling by tissue type  
21 were statistically significant (Fisher's exact test  $p = 0.003$ ). Table S1 gives counts of all samples  
22 collected and samples retained after QC, for each collection time day.

23 After removing low-quality samples, we performed functional normalization to reduce  
24 probe type (Infinium Type I vs. Type II) and batch (i.e., plate, chip, row, and column) effects. The  
25 reduction in chip, row, and column effects can be visualized in the distribution of M-values, before  
26 and after functional normalization, for samples profiled together on a plate (Figure 3). Row effects  
27 are apparent for some chips as increasing means across adjacent samples. For example, before  
28 normalization the third chip from the left in Figure 3A shows strong row effects indicated by means  
29 forming an upwardly sloped trend across the first to fifth samples (which correspond to ascending  
30 rows in the first column), followed by another upwardly sloped trend across the sixth to eleventh  
31 samples (which correspond to ascending rows in the second column). Functional normalization



1 increased concordance in median methylation between 34 technical replicate CSF samples ( $p =$   
2 0.015) (Figure 4). For the 4 technical replicate blood samples, the same trend of increased  
3 concordance after functional normalization was observed; however, this trend was not statistically  
4 significant ( $p = 0.153$ ).

### 6 **3.2 CpG probe-level Quality Control**

7 Individual probes were filtered out of analyses for reasons pertaining to probe design such  
8 as overlap with common single nucleotide polymorphisms (SNPs) and cross-reactivity with off-  
9 target genomic positions. Additionally, CpG probes on the sex-chromosomes were excluded.  
10 Based on QC analyses, CpG probes with multimodal beta-value distributions, low detection  
11 quality across samples, and high technical variation across replicate samples were also filtered out  
12 of analyses. CpG probe-level filtering criteria are summarized in Table 2. For each QC filtering  
13 step, and overall, fewer CpGs were filtered out in blood than in CSF ( $p < 2.2 \times 10^{-16}$  for all),  
14 indicating that CSF samples may yield somewhat lower-quality methylation data, as is also evident  
15 in Figure 1.

### 17 **3.3 B-cell Leukemia Outlier**

18 Estimated blood cell type proportions using the reference-based method followed  
19 expectations for all blood samples with one exception, which showed high B-cell composition in  
20 analysis. Further clinical investigation confirmed the presence of chronic lymphocytic leukemia  
21 (CLL) in the individual, which is known to cause increased proliferation of B cells in blood, bone  
22 marrow and other lymphoid tissues (Zhang and Kipps 2014; Ciccone et al. 2014; Hallek 2015;  
23 Greenberg and Probst 2013; Ghia and Hallek 2014). Samples from this participant were excluded  
24 from further analyses.

### 26 **3.4 Adjustment for Cell Type Heterogeneity**

27 Because methylomic profiles differ widely by cell type, modeling cell type heterogeneity  
28 across samples is crucial for valid cross-sample analyses of methylation data. However, external  
29 cell type-specific reference data was not available for post-aSAH CSF for use in reference-based  
30 adjustment. Therefore, we performed reference-free adjustment using SVA to remove unknown  
31 sources of variation including cell type heterogeneity. We further excluded technical replicates

1 from all samples that passed QC, leaving 70 blood samples and 154, 246, 217, 152, and 95 CSF  
2 samples for days 1, 4, 7, 10 and 13 respectively. Ten surrogate variables (SVs) were generated for  
3 the set of blood samples, and 13 SVs were generated for day 1 CSF samples. Fifteen, 15, 14 and  
4 10 surrogate variables were generated for CSF samples for day 4, 7, 10 and 13 respectively. To  
5 determine the benefit of SV-adjustment, we interrogated its effect on CpG site association tests  
6 under the null model of no association by simulating a dummy binary phenotype similar to the  
7 distribution of DCI and performing EWAS, with and without including SVs as covariates. The  
8 behavior of the test statistic better followed the null distribution after SV-adjustment, as shown in  
9 quantile-quantile plots (Figure 5). Specifically, genomic inflation factor ( $\lambda$ ) improved from 1.11  
10 to 0.98 in the set of blood samples, and improved from 0.73 to 0.99 in the set of CSF samples  
11 within two days after hemorrhage (Figure 5) and likewise in other CSF subsets (Supplemental  
12 Figures 2 and 3). Genomic deflation may be caused by sources of variation including cell type  
13 heterogeneity that cause correlation across CpG sites within a sample, equating to a reduction in  
14 the effective number of independent tests. These results show that in the absence of reference data,  
15 SVA aids in controlling the adverse impact of cell-type heterogeneity and other sources of  
16 unwanted variation on tests of epigenetic association.

17

### 18 **3.5 Correlation was low when comparing DNA methylation of post-aSAH blood and CSF**

19 Following our long-term goal of understanding the methylomic changes occurring across  
20 tissues after aSAH, we explored the suitability of peripheral blood collected within the first day of  
21 hospitalization as a surrogate for the normally less accessible longitudinally collected CSF based  
22 on the correlation of adjusted M-values between the two tissue types obtained from aSAH patients.  
23 Specifically, we compared the methylation profile of blood collected within 48h of hospitalization  
24 versus CSF samples collected at day 1, 4, 7, 10 and 13 post rupture respectively. Table 3  
25 summarizes the numbers of CpGs used and the correlation coefficients for each day. In general,  
26 the mean correlation (0.23 - 0.26) was too low to use blood as a surrogate for post-aSAH CSF in  
27 a global manner.

28 Differences were observed in the magnitude of the correlation by genomic position (CpG  
29 island, shore, shelf, and open sea;  $p < 0.001$  for all), with islands and shores showing greater  
30 positive correlation than shelves and seas (Figure 6, Supplemental Figures 4-7). Similarly, the  
31 magnitude of the correlation differed by the orientation of CpG with respect to the nearest gene

1 ([3' UTR, TSS, Exon, Body, 5'UTR],  $p < 0.01$ ), with CpG sites near the transcription start site or  
2 first exon showing greater inter-tissue correlation than CpG sites in the upstream, downstream or  
3 in the body of genes. The CpGs sites upstream or in the body of genes, in turn, showed greater  
4 correlation than CpG sites downstream of the gene.

5

#### 6 **4 Discussion**

7 Our protocol demonstrated the value of several QC procedures in obtaining clean and  
8 useful methylation data for subsequent scientific analyses. In particular, in addition to quality  
9 filters at the sample and CpG probe level, we showed that functional normalization was helpful in  
10 reducing batch effects for both blood and CSF. Likewise, SVA was useful for adjusting for  
11 unknown sources of variation, including cell type heterogeneity, as evidenced by improved  
12 genomic inflation factor for a simulated EWAS scan under the null hypothesis. This observation  
13 is particularly important for studies of tissue types, such as CSF, that are underrepresented in the  
14 methylomics literature, and for which external cell type reference data are not yet available. We  
15 also provided evidence that, overall, CSF samples yielded lower-quality methylomic data than did  
16 blood samples. This observation may reflect the low cell content (de Graaf, Smitt, et al. 2011; de  
17 Graaf, de Jongste, et al. 2011; Svenningsson et al. 1995) in CSF compared to blood. Altogether,  
18 these lessons can inform the design of future analyses seeking to investigate the methylomic  
19 profiles in post-aSAH CSF samples. The efficiency of a reference-based method in capturing the  
20 outlier with high proportion of B-cells is promising.

21 We also explored the question of whether methylomic profiles from blood samples could  
22 serve as surrogates for less accessible CSF. Though significant positive correlations were  
23 observed, especially for regulatory regions such as CpG islands and locations near transcriptional  
24 start sites of genes, globally, the correlations in methylation values between blood and CSF were  
25 too low for blood to serve as a useful surrogate for most scientific or clinical purposes. However,  
26 to understand the methylomic changes that occur post-aSAH, we believe that CSF would be a most  
27 relevant source, representing the central nervous system (CNS) environment and its proximity to  
28 the hemorrhagic location.

29 This study benefited from several strengths including the thoughtful plate design aimed at  
30 reducing confounding of experimental effects with technical artifacts, thorough and rigorous  
31 application of data QC procedures, pairing of blood and CSF samples from the same patients, and

1 assessment of methylomic profiles in a novel tissue type (post-aSAH CSF) that captures the CNS  
2 environment post-aSAH. The study is also novel as this is the first to investigate methylation  
3 patterns in DNA extracted from CSF over a longitudinal period after aSAH. Despite these  
4 strengths, limitations of the current study include limited statistical power to resolve the intra  
5 subject differences among the samples that may ultimately pose challenges in using this dataset  
6 for future EWAS studies. Additionally, the cell composition of CSF may vary over time after  
7 hemorrhage, which would also affect the methylation levels. Thus, longitudinal analyses of post-  
8 aSAH samples are challenging as cell-type heterogeneity may be confounded with days post  
9 injury. Overcoming these challenges will be necessary to accomplish goals such as identifying  
10 genes whose changes in methylation after injury are predictive of recovery outcomes.

11 In conclusion, this study is one of the first attempts to investigate DNA methylation at the  
12 genome scale in a sample of aSAH patients, as well as one of the first to measure methylation in  
13 CSF. Our analysis protocol showed that methylomic profiles can be obtained from CSF for use in  
14 EWAS analysis and that QC steps can improve the analysis by eliminating low-quality data points  
15 and reducing biases and experimental artifacts. Likewise, we show that blood, while readily  
16 accessible, is not a sufficient surrogate for the methylomic status of CSF. Ultimately, efforts to  
17 understand methylation profiles in aSAH patients, and changes that occur post-injury, may lead to  
18 the discovery of biomarkers of clinical utility in predicting patient recovery.

1 **Author contributions**

2 YC is the principal investigator of the project. YC, DW and JS conceived and designed  
3 the study. AA, DL, TK, JS, DW performed the experiments and statistical analysis. AIA, JRS  
4 and DEW contributed to the initial writing of the manuscript. EAC contributed to the clinical  
5 investigation of the research. All authors reviewed, edited, and approved the final manuscript.

6 **Conflict of Interest**

7 The authors declare that the research was conducted in the absence of any commercial or  
8 financial relationships that could be construed as a potential conflict of interest.

9

10 **Acknowledgements**

11 Foremost, we thank the participants of this study for making this work possible. Funding  
12 for this study was provided by the National Institute of Health (R01NR013610). We thank UPMC  
13 for access of the clinical samples.

14

15 **Public Data Access**

16 The data can be accessed through dbGAP: phs001990.v1.p1.

1 **Figure 1: Identification of low-quality samples** (red) based on high proportion of poorly detected  
2 probes (x-axis) and/or low average bisulfite intensity (y-axis) from **(A)** 92 blood samples and **(B)**  
3 1,012 CSF samples, both including technical replicates. The horizontal lines represent the  
4 threshold 3 SD below the mean across samples for bisulphite intensity, and the vertical lines  
5 represent the threshold of 1% of probes for which detection was poor (based on detection p-value  
6 and number of beads).

7  
8 **Figure 2: Distribution of beta-values** across **(A)** all blood and **(B)** all CSF samples shows that a  
9 subset of poorly performing samples (red) deviate from the typical distribution. After removal of  
10 poor performing samples, distributions in **(C)** blood and **(D)** CSF are more consistent.

11  
12 **Figure 3: Functional normalization reduces batch effects.** Boxplots show the distribution of  
13 M-values per sample across the plate of **(A)** blood samples before, and **(B)** after, functional  
14 normalization. For each sample, the median M-value is indicated by the black horizontal line and  
15 the interquartile range (25<sup>th</sup> to 75% percentile) is indicated by the colored box. The whiskers  
16 (dashed lines) extend to the most extreme data point within 1.5 times the interquartile range beyond  
17 the box, and outlier points beyond this limit are shown individually as circles. Samples are colored  
18 coded by chip, and samples are ordered within each chip as follows: first column ascending by  
19 row number followed by second column ascending by row number. Before normalization, chip  
20 effects are apparent as differences in median and interquartile range between color groups. **(C)**  
21 CSF samples before, and **(D)** after, functional normalization on an example plate. Comparing the  
22 blow-ups to the right of each plot show variation in median M-values across samples is reduced  
23 after functional normalization.

24  
25 **Figure 4: Functional normalization increases concordance of technical replicates.** Boxplots  
26 showing distribution of M-values for duplicate **(A, B)** blood and **(C, D)** CSF samples **(A, C)** before,  
27 and **(B, D)** after, functional normalization. Pairs of duplicates are adjacent to each other and  
28 differentiated by color. For each sample, the median M-value is indicated by the black horizontal  
29 line and the interquartile range (25<sup>th</sup> to 75<sup>th</sup> percentile) is indicated by the colored box. The  
30 whiskers (dashed lines) extend to the most extreme data point within 1.5 times the interquartile  
31 range beyond the box, and outlier points beyond this limit are shown individually as circles.

1

2 **Figure 5: Quantile-quantile plots showing the benefit of SVA for tests of epigenetic**

3 **association.** The distribution of observed p-values obtained for a random simulated phenotype (y-

4 axis) are plotted against the expected distribution of p-values under the null model of no

5 association in (A, B) blood samples, and (C, D) CSF samples at day 1. The genomic inflation

6 factor,  $\lambda$ , is at top left on each plot. (A) Simulated EWAS without SV-adjustment showed inflation

7 with a  $\lambda = 1.11$  (B) After SV-adjustment the EWAS closely follows the null distribution as

8 indicated by points closely following the diagonal. (C) Simulated EWAS exhibits genomic

9 deflation with a  $\lambda = 0.73$  (D) After SV-adjustment, the EWAS closely follows the null distribution

10 (i.e., points closely following the diagonal).

11

12 **Figure 6: Correlation between blood and CSF** at day 1 for CpG sites across (A) genomic

13 regions, and (B) relative to genes. Bean plots depict the median correlation coefficient (horizontal

14 line), mean (diamond), interquartile range (i.e., 25<sup>th</sup> to 75<sup>th</sup> percentile, box), and density (width of

15 the bean). (TSS – Transcription start site; UTR – Untranslated region).

16

1

2 **Table 1. Characteristics of study participants**

|                               | Blood (N=88) | CSF (N=279)   |
|-------------------------------|--------------|---------------|
| Demographic                   |              |               |
| Age (years)                   | 52.4±11.1    | 52.9±11.0     |
| Gender (female/male)          | 59/29 (67%)  | 193/86 (69%)  |
| Race (white/black/others)     | 76 (86%)/    | 243 (87%)/    |
|                               | 10 (11%)/    | 30 (11%)/     |
|                               | 2 (2%)       | 6 (2%)        |
| Height (in)                   | 66.1±4.8     | 66.1±4.3      |
| Weight (kg)                   | 80.6±19.7    | 78.6±20.0     |
| Clinical                      |              |               |
| Current smoke (yes/no)        | 50/37 (57%)  | 155/120 (56%) |
| Fisher grade (2/3/4)          | 23 (26%)/    | 83 (30%)/     |
|                               | 48 (55%)/    | 138 (49%)/    |
|                               | 17 (19%)     | 58 (21%)      |
| Hunt & Hess score (1/2/3/4/5) | 2 (2%)/      | 20 (7%)/      |
|                               | 26 (30%)/    | 84 (30%)/     |
|                               | 37 (42%)/    | 109 (39%)/    |
|                               | 19 (22%)/    | 48 (17%)/     |
|                               | 4 (5%)       | 18 (6%)       |
| DCI (yes/no)                  | 45/42 (52%)  | 123/154 (44%) |

3 Values are presented as mean±sd for continuous variables, category count followed by  
4 percentage of the first category for binary variables, and count (percentage) for variable with  
5 multiple categories. Missing values exist for some variables, accounting for the discrepancy  
6 between count sum and sample size.



1

| <b>Sequential filtering step</b>   | <b>Blood</b>    |                 | <b>CSF</b>      |                 |
|------------------------------------|-----------------|-----------------|-----------------|-----------------|
|                                    | <b>Filtered</b> | <b>Retained</b> | <b>Filtered</b> | <b>Retained</b> |
| none                               |                 | 485,512         |                 | 485,512         |
| probe sequence overlapping SNP     | 17,541          | 467,971         | 17,541          | 467,971         |
| off-target cross-reactivity        | 36,489          | 431,482         | 36,489          | 431,482         |
| sex chromosome                     | 10,191          | 421,291         | 10,191          | 421,291         |
| multimodal beta-value distribution | 2,072           | 419,219         | 6,142           | 415,149         |
| low-quality detection              | 972             | 418,247         | 1,300           | 413,849         |

*\*McNemar p-value ( $< 2.26 \times 10^{-16}$ ) across all five filtering steps combined.*

2

3

4

| <b>Days of CSF samples</b> | <b>Day 1</b> | <b>Days 4</b> | <b>Days 7</b> | <b>Days 10</b> | <b>Days 13</b> |
|----------------------------|--------------|---------------|---------------|----------------|----------------|
| No of subjects             | 65           | 64            | 65            | 61             | 47             |
| CpG sites                  | 266,009      | 257,979       | 255,624       | 256,758        | 255,459        |
| Mean correlation value     | 0.233        | 0.263         | 0.262         | 0.253          | 0.242          |
| Median correlation value   | 0.174        | 0.199         | 0.197         | 0.190          | 0.187          |

5

1 **References**

- 2
- 3 Aryee, M. J., A. E. Jaffe, H. Corrada-Bravo, C. Ladd-Acosta, A. P. Feinberg, K. D. Hansen, and  
4 R. A. Irizarry. 2014. 'Minfi: a flexible and comprehensive Bioconductor package for the  
5 analysis of Infinium DNA methylation microarrays', *Bioinformatics*, 30: 1363-9.
- 6 Ciccone, M., A. Ferrajoli, M. J. Keating, and G. A. Calin. 2014. 'SnapShot: chronic lymphocytic  
7 leukemia', *Cancer Cell*, 26: 770-70 e1.
- 8 de Graaf, M. T., A. H. de Jongste, J. Kraan, J. G. Boonstra, P. A. Sillevius Smitt, and J. W. Gratama.  
9 2011. 'Flow cytometric characterization of cerebrospinal fluid cells', *Cytometry B Clin Cytom*,  
10 80: 271-81.
- 11 de Graaf, M. T., P. A. Smitt, R. L. Luitwieler, C. van Velzen, P. D. van den Broek, J. Kraan, and  
12 J. W. Gratama. 2011. 'Central memory CD4+ T cells dominate the normal cerebrospinal fluid',  
13 *Cytometry B Clin Cytom*, 80: 43-50.
- 14 Endres, M., A. Meisel, D. Biniszkiwicz, S. Namura, K. Prass, K. Ruscher, A. Lipski, R. Jaenisch,  
15 M. A. Moskowitz, and U. Dirnagl. 2000. 'DNA methyltransferase contributes to delayed  
16 ischemic brain injury', *J Neurosci*, 20: 3175-81.
- 17 Fisher, C. M., J. P. Kistler, and J. M. Davis. 1980. 'Relation of cerebral vasospasm to subarachnoid  
18 hemorrhage visualized by computerized tomographic scanning', *Neurosurgery*, 6: 1-9.
- 19 Fortin, J. P., A. Labbe, M. Lemire, B. W. Zanke, T. J. Hudson, E. J. Fertig, C. M. Greenwood, and  
20 K. D. Hansen. 2014. 'Functional normalization of 450k methylation array data improves  
21 replication in large cancer studies', *Genome Biol*, 15: 503.
- 22 Ghia, P., and M. Hallek. 2014. 'Management of chronic lymphocytic leukemia', *Haematologica*,  
23 99: 965-72.
- 24 Greenberg, E. M., and A. Probst. 2013. 'Chronic leukemia', *Crit Care Nurs Clin North Am*, 25:  
25 459-70, vi.
- 26 Hallek, M. 2015. 'Chronic lymphocytic leukemia: 2015 Update on diagnosis, risk stratification,  
27 and treatment', *Am J Hematol*, 90: 446-60.
- 28 Houseman, E. A., W. P. Accomando, D. C. Koestler, B. C. Christensen, C. J. Marsit, H. H. Nelson,  
29 J. K. Wiencke, and K. T. Kelsey. 2012. 'DNA methylation arrays as surrogate measures of cell  
30 mixture distribution', *BMC Bioinformatics*, 13: 86.
- 31 Hunt, W. E., and R. M. Hess. 1968. 'Surgical risk as related to time of intervention in the repair of  
32 intracranial aneurysms', *J Neurosurg*, 28: 14-20.
- 33 Leek, J. T., W. E. Johnson, H. S. Parker, A. E. Jaffe, and J. D. Storey. 2012. 'The sva package for  
34 removing batch effects and other unwanted variation in high-throughput experiments',  
35 *Bioinformatics*, 28: 882-3.
- 36 Marabita, F., M. Almgren, M. E. Lindholm, S. Ruhrmann, F. Fagerstrom-Billai, M. Jagodic, C. J.  
37 Sundberg, T. J. Ekstrom, A. E. Teschendorff, J. Tegner, and D. Gomez-Cabrero. 2013. 'An  
38 evaluation of analysis pipelines for DNA methylation profiling using the Illumina  
39 HumanMethylation450 BeadChip platform', *Epigenetics*, 8: 333-46.

- 1 Morris, T. J., and S. Beck. 2015. 'Analysis pipelines and packages for Infinium  
2 HumanMethylation450 BeadChip (450k) data', *Methods*, 72: 3-8.
- 3 Nelson, E. D., E. T. Kavalali, and L. M. Monteggia. 2008. 'Activity-dependent suppression of  
4 miniature neurotransmission through the regulation of DNA methylation', *J Neurosci*, 28: 395-  
5 406.
- 6 Stapels, M., C. Piper, T. Yang, M. Li, C. Stowell, Z. G. Xiong, J. Saugstad, R. P. Simon, S.  
7 Geromanos, J. Langridge, J. Q. Lan, and A. Zhou. 2010. 'Polycomb group proteins as  
8 epigenetic mediators of neuroprotection in ischemic tolerance', *Sci Signal*, 3: ra15.
- 9 Svenningsson, A., O. Andersen, M. Edsbacke, and S. Stemme. 1995. 'Lymphocyte phenotype and  
10 subset distribution in normal cerebrospinal fluid', *J Neuroimmunol*, 63: 39-46.
- 11 Wermer, M. J., H. Kool, K. W. Albrecht, G. J. Rinkel, and Group Aneurysm Screening after  
12 Treatment for Ruptured Aneurysms Study. 2007. 'Subarachnoid hemorrhage treated with  
13 clipping: long-term effects on employment, relationships, personality, and mood',  
14 *Neurosurgery*, 60: 91-7; discussion 97-8.
- 15 Xu, Z., S. A. Langie, P. De Boever, J. A. Taylor, and L. Niu. 2017. 'RELIC: a novel dye-bias  
16 correction method for Illumina Methylation BeadChip', *BMC Genomics*, 18: 4.
- 17 Xu, Z., L. Niu, L. Li, and J. A. Taylor. 2016. 'ENmix: a novel background correction method for  
18 Illumina HumanMethylation450 BeadChip', *Nucleic Acids Res*, 44: e20.
- 19 Zhang, S., and T. J. Kipps. 2014. 'The pathogenesis of chronic lymphocytic leukemia', *Annu Rev*  
20 *Pathol*, 9: 103-18.
- 21

**A**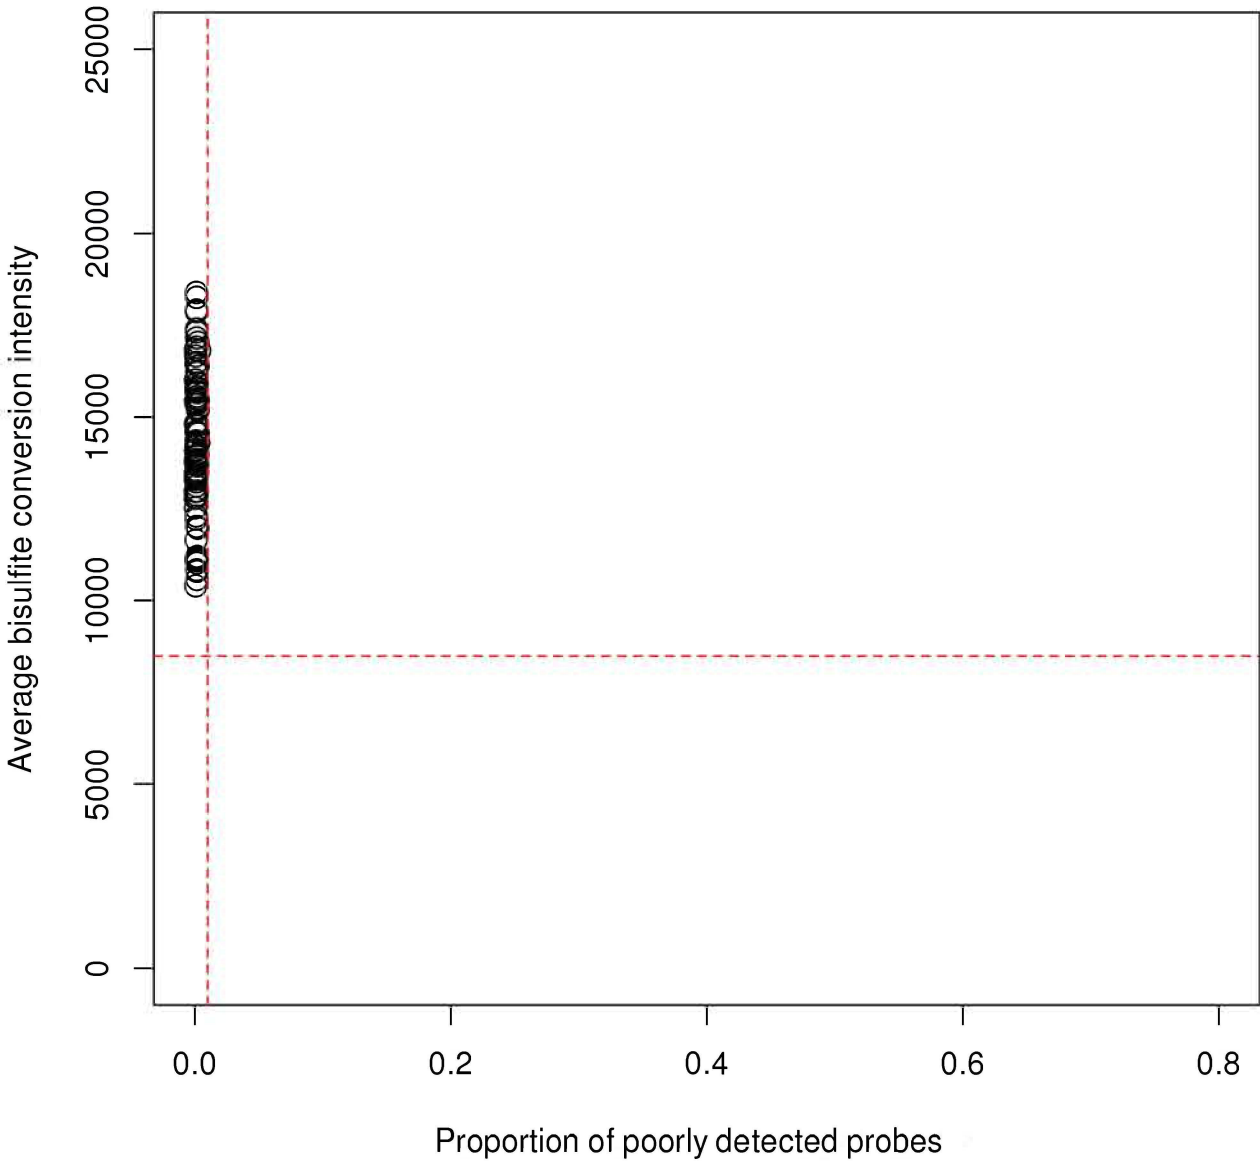**B**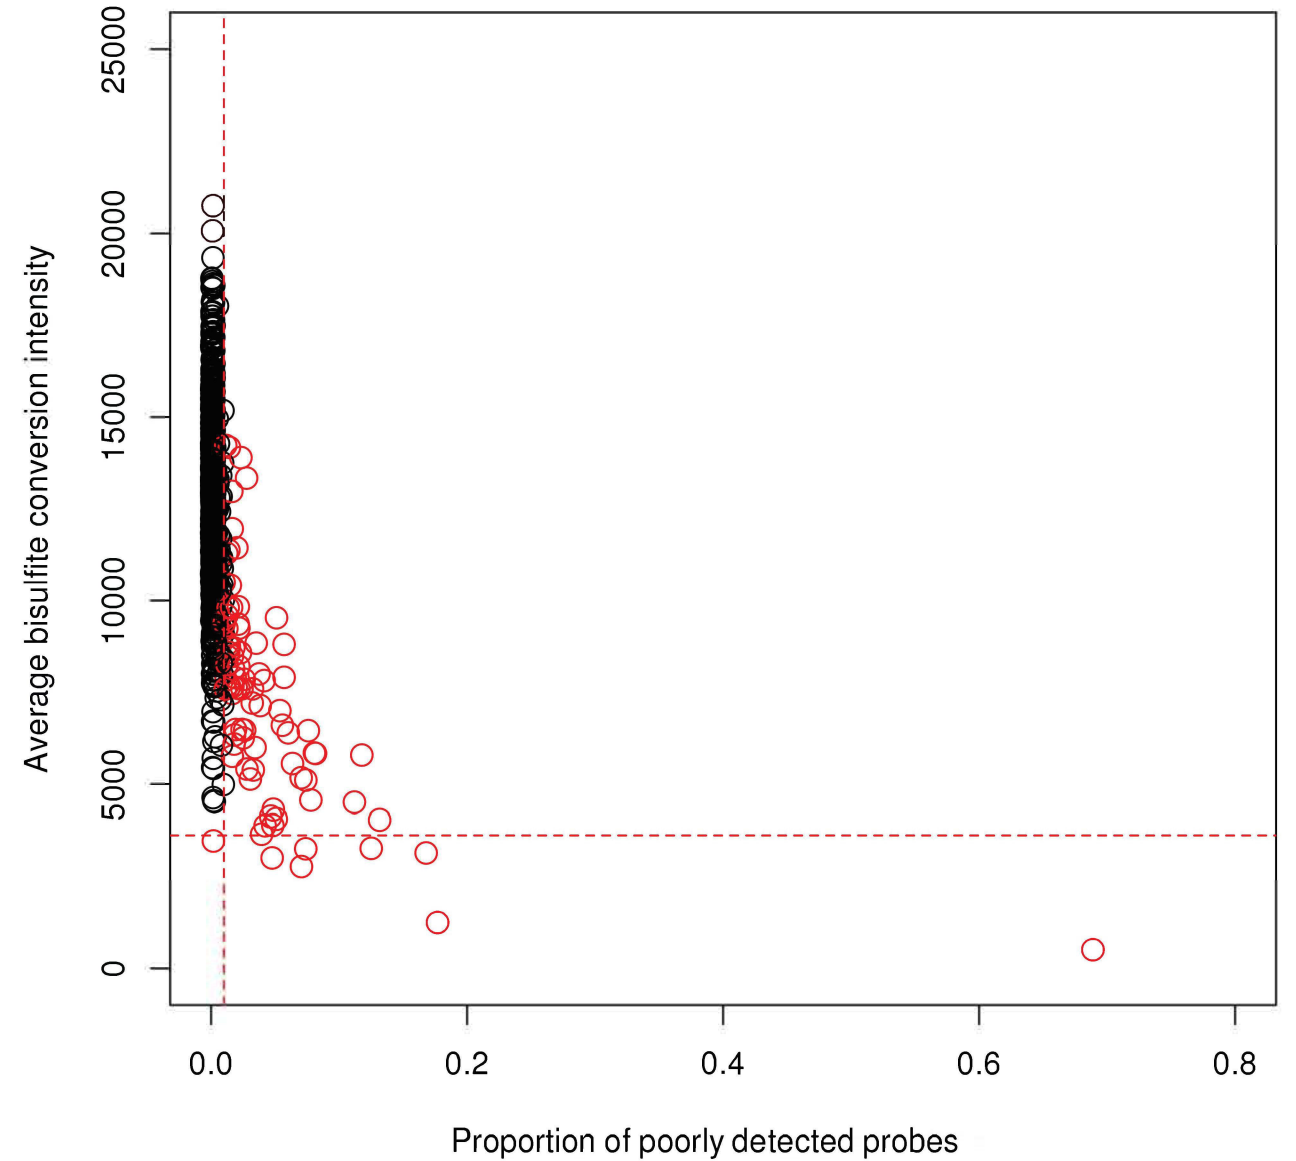

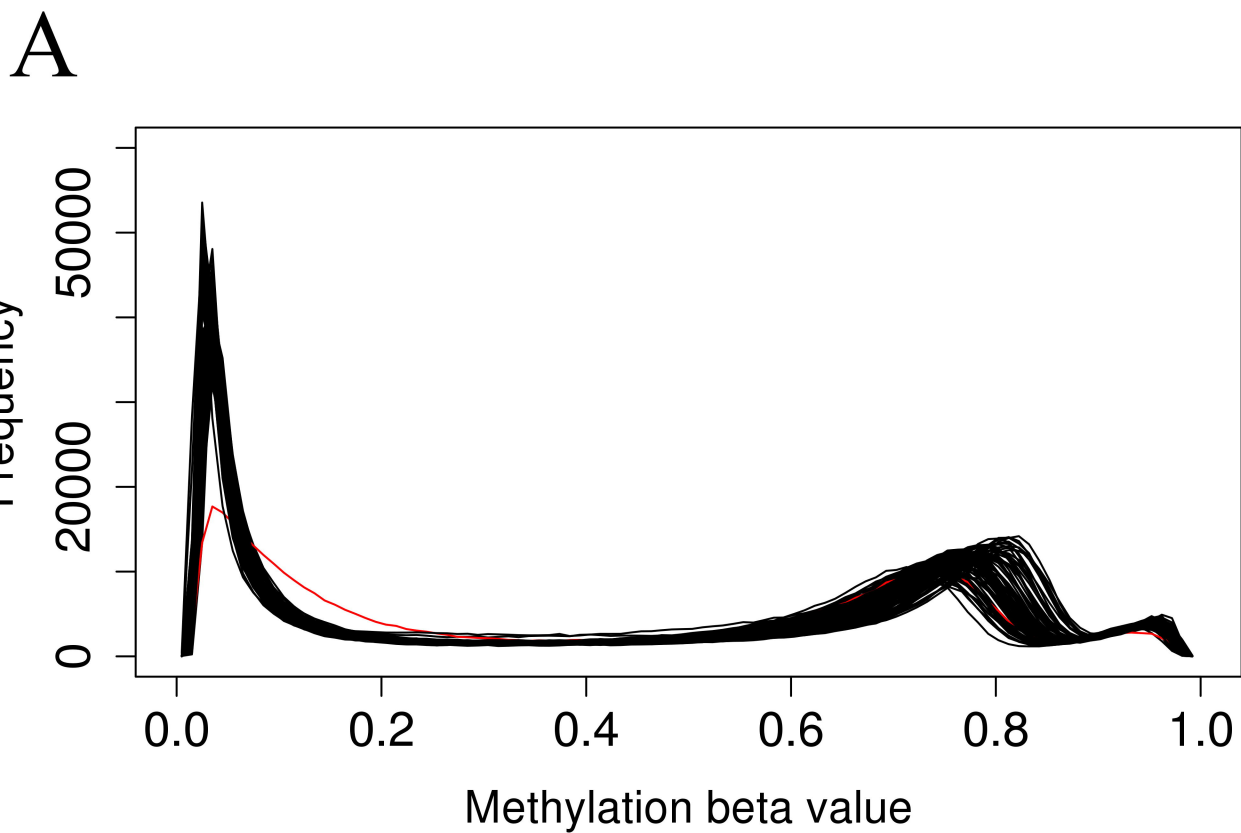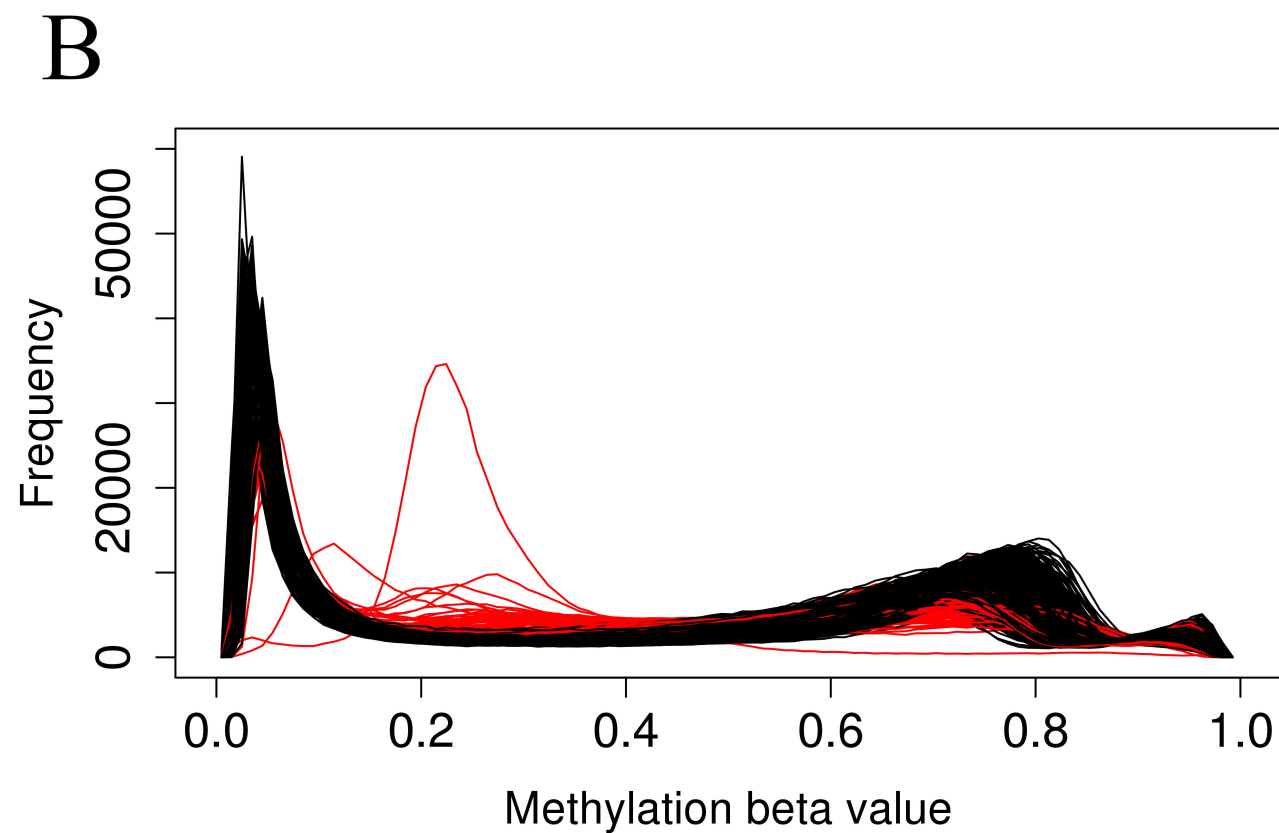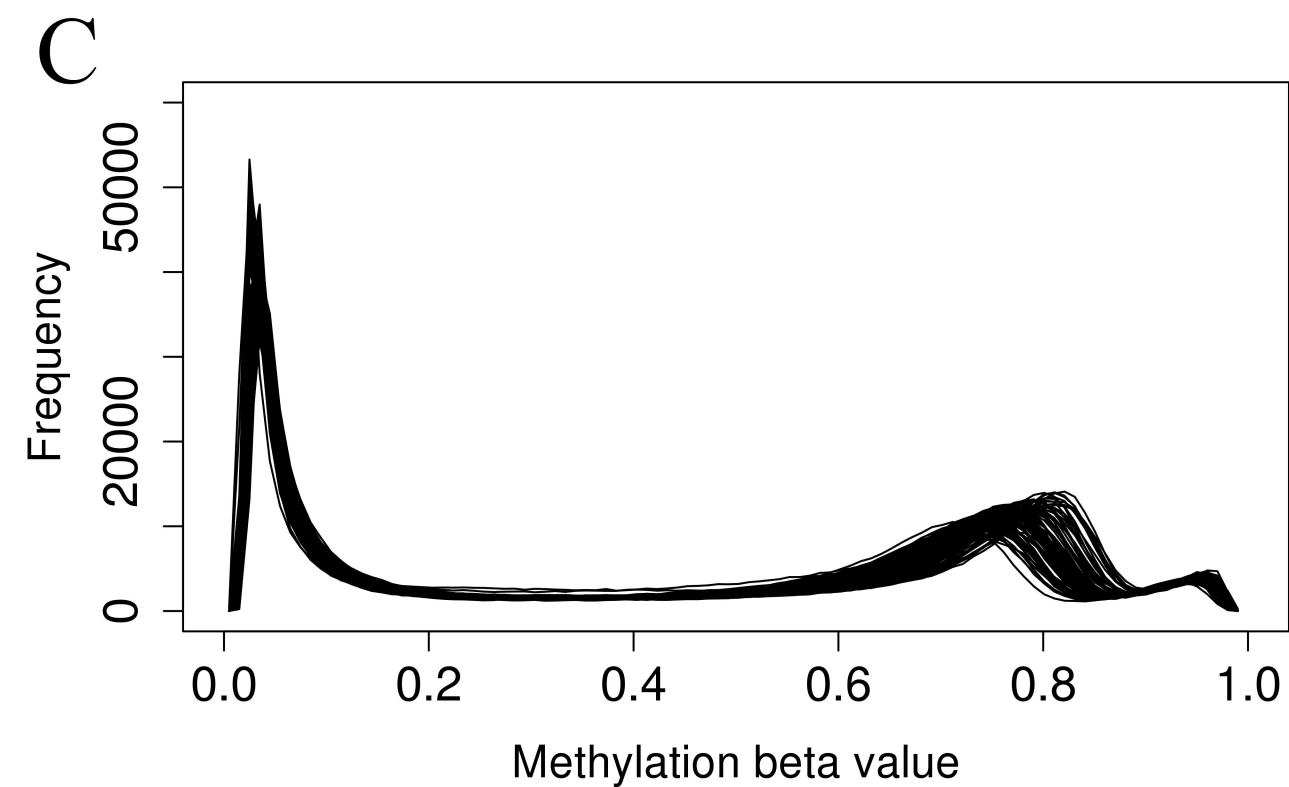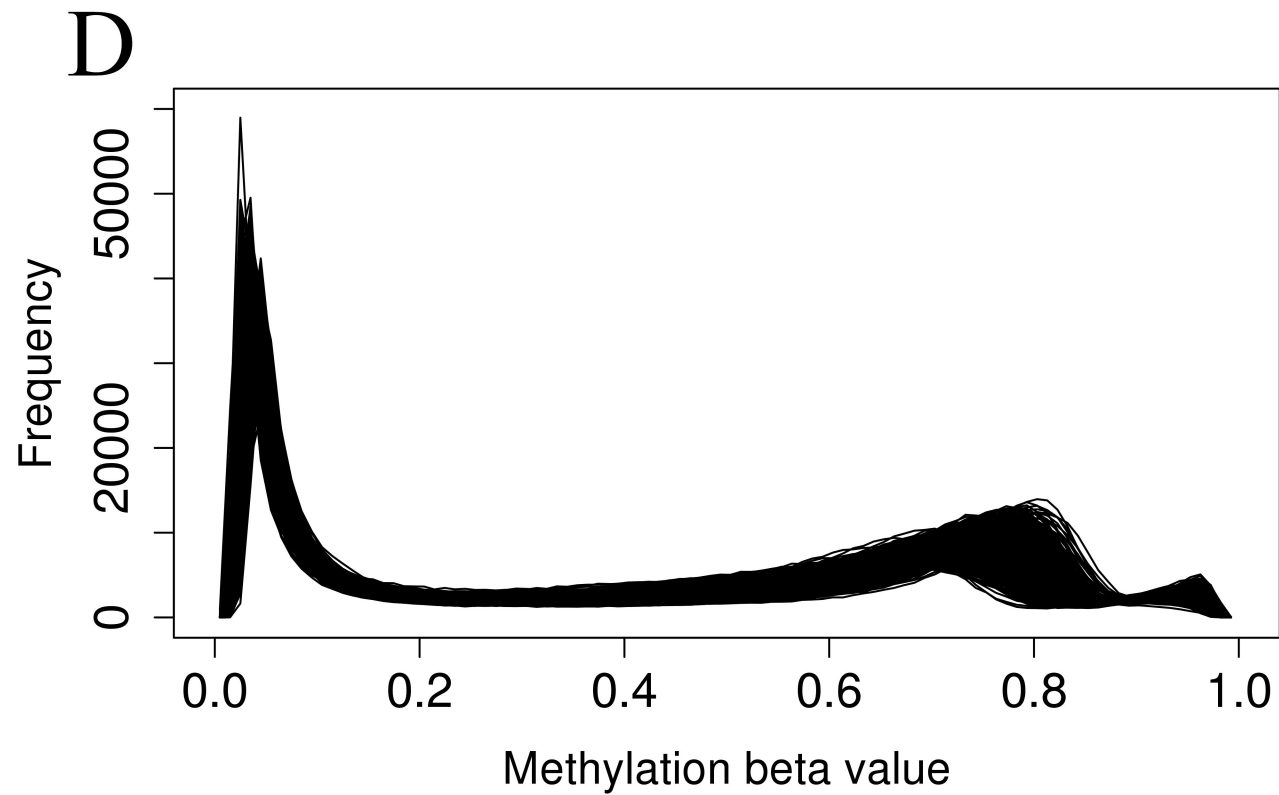

**A**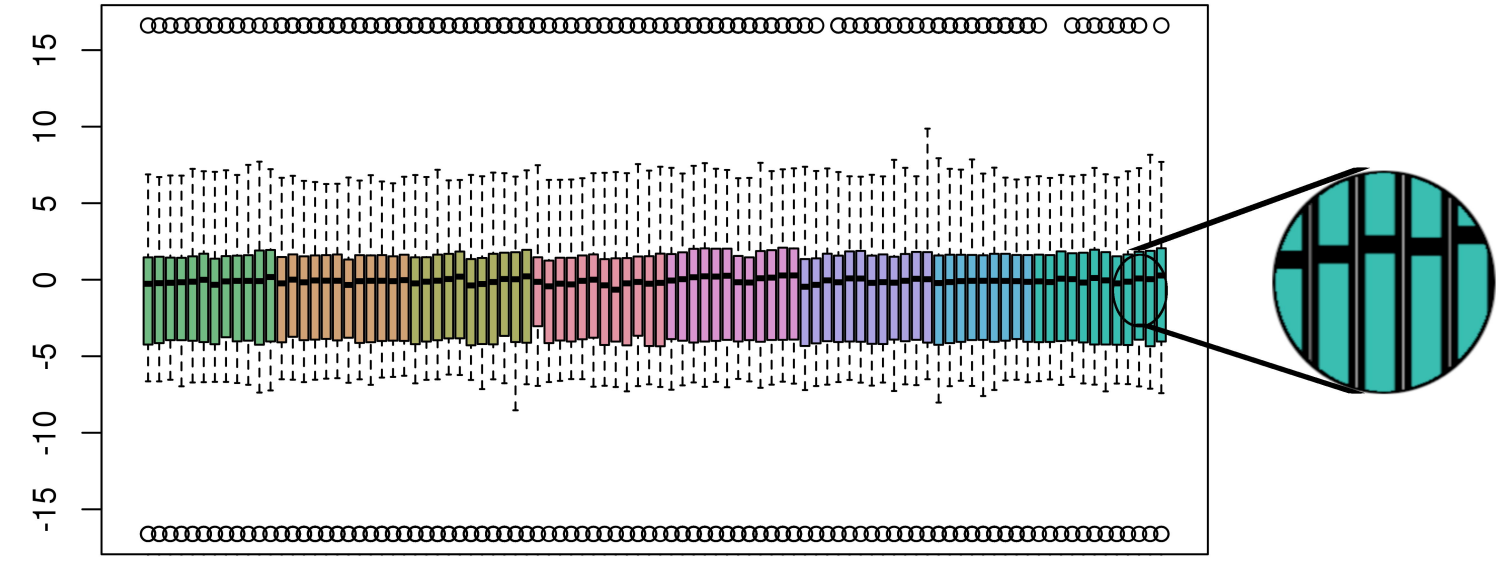**B**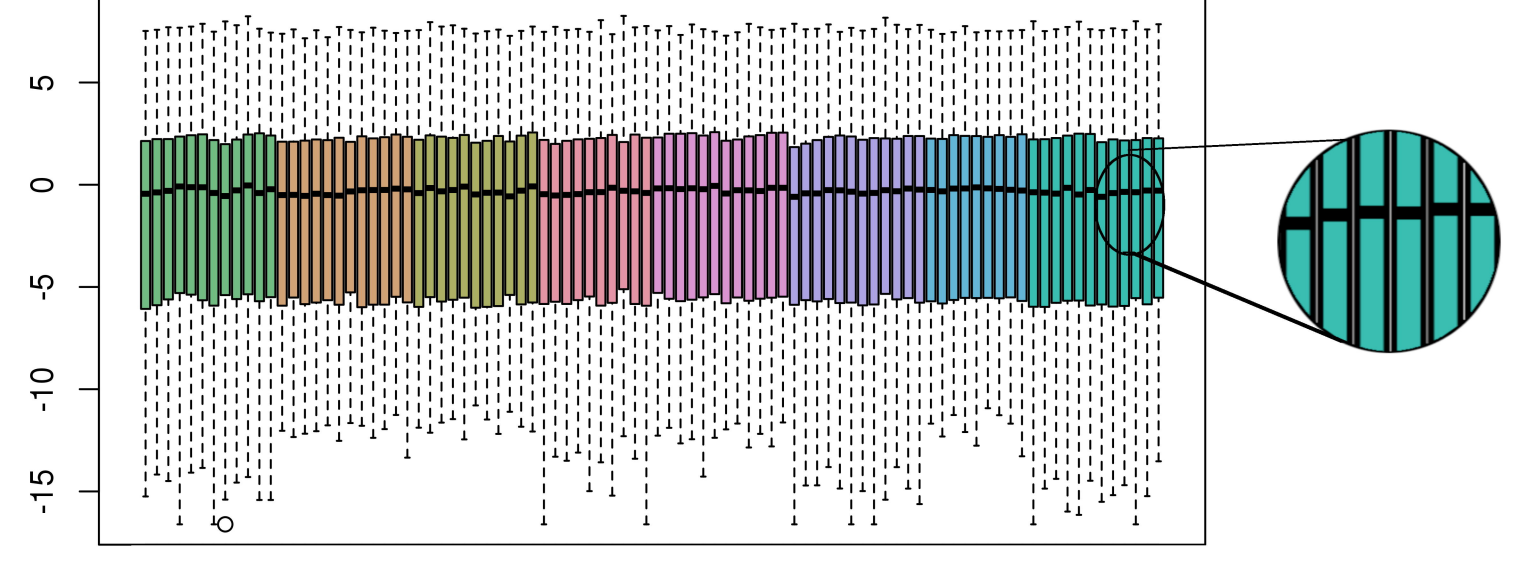**C**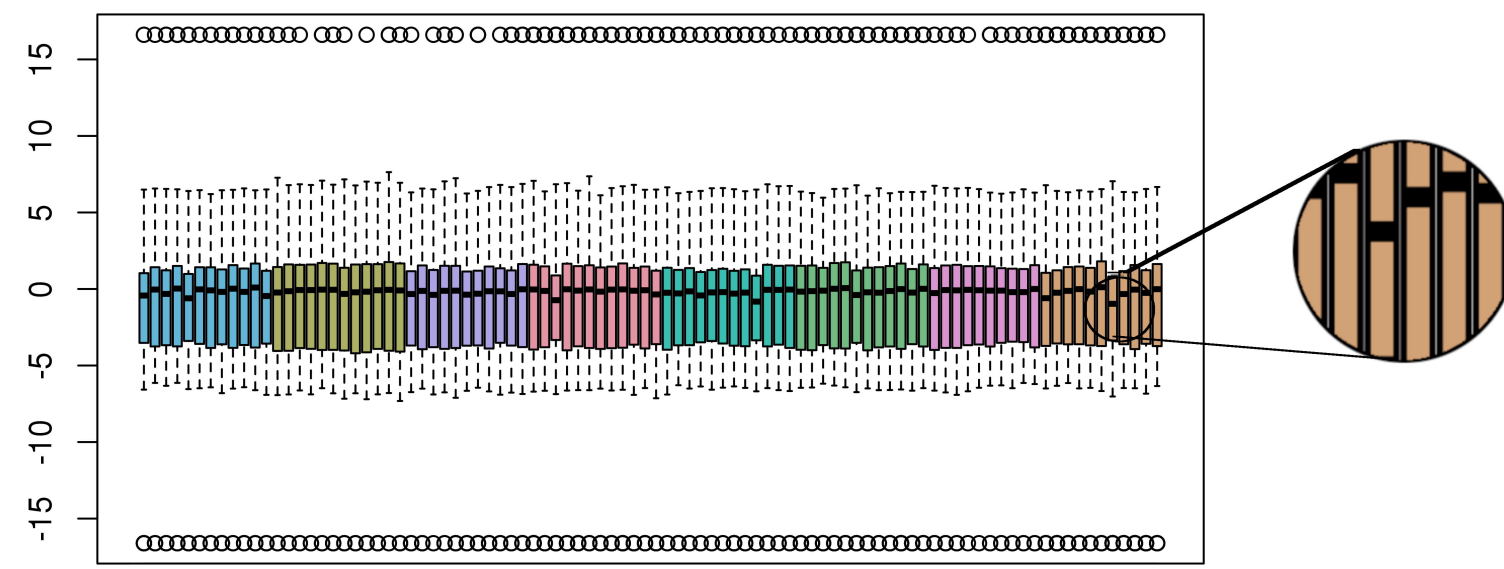**D**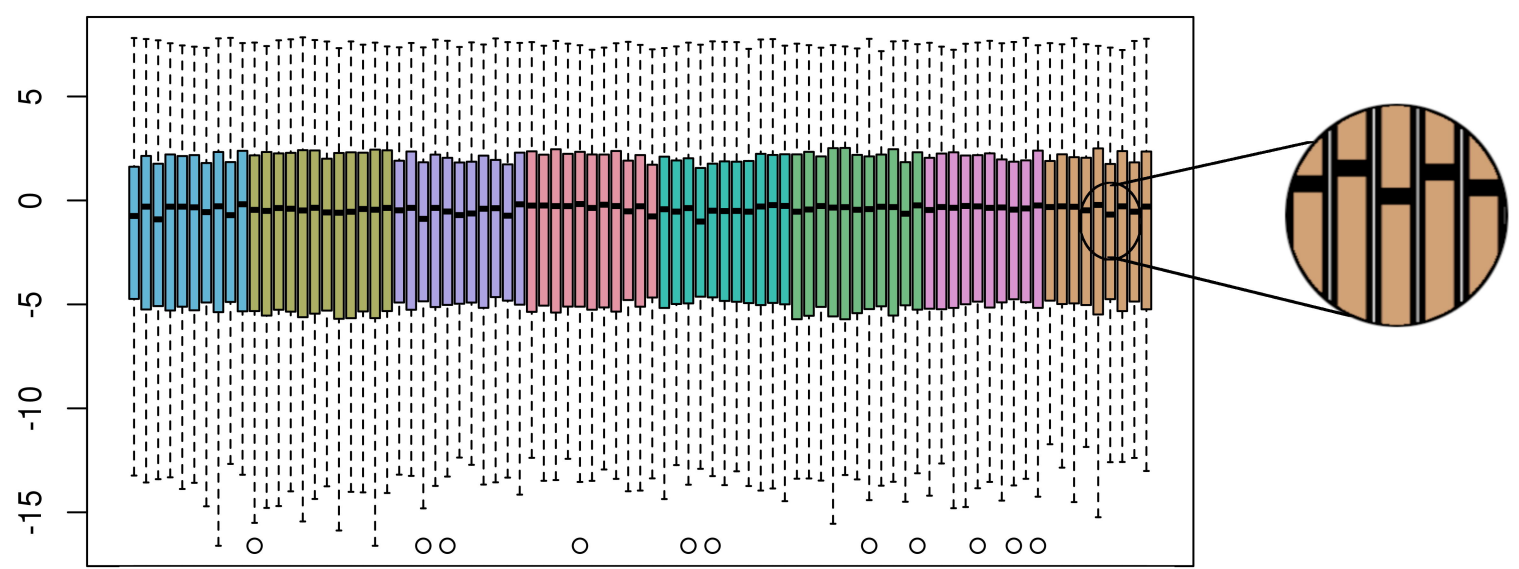

**A**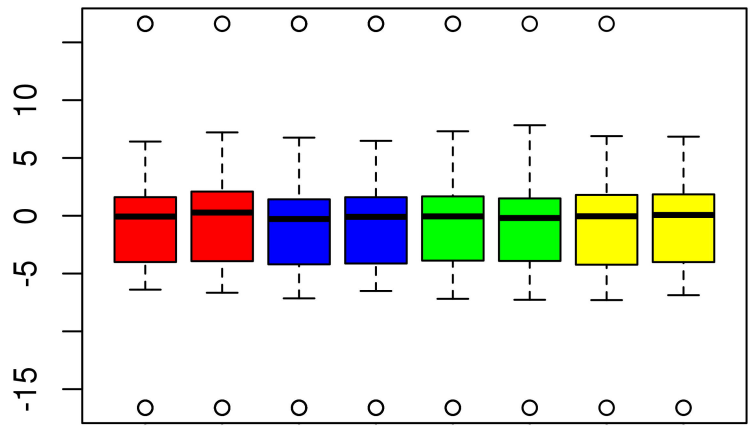**B**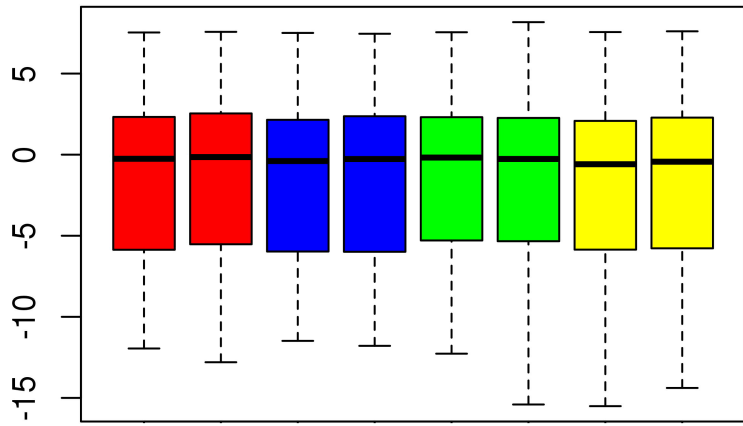**C**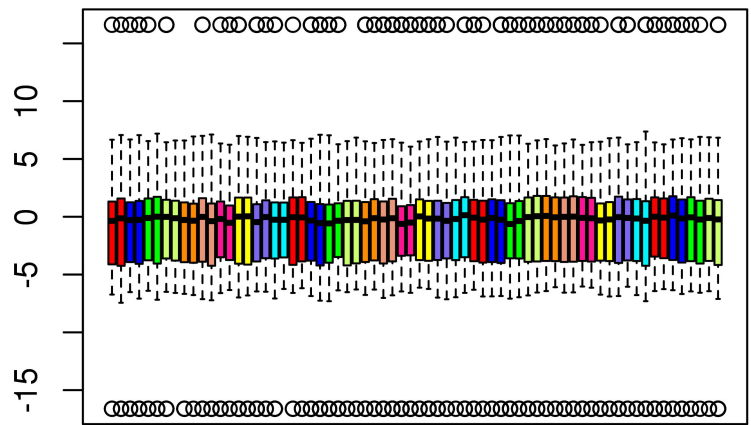**D**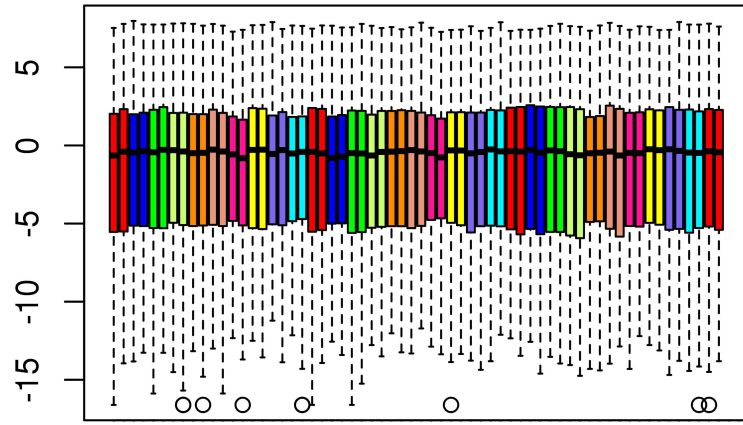

**A**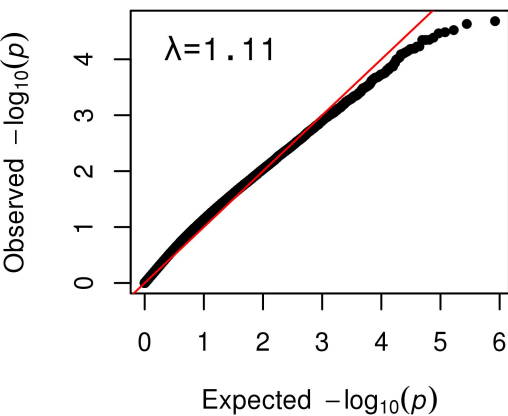**B**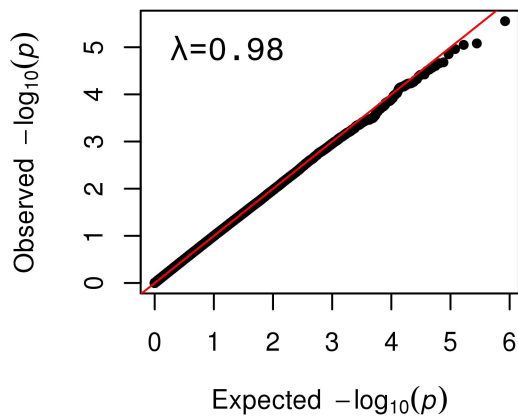**C**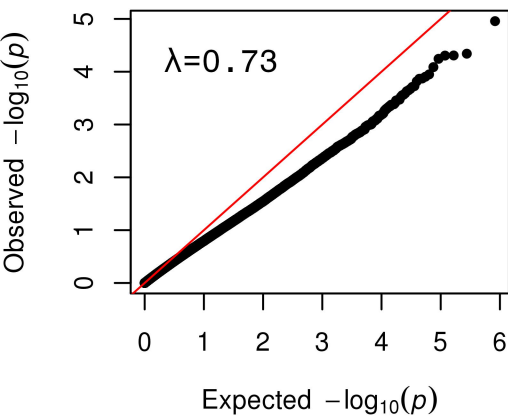**D**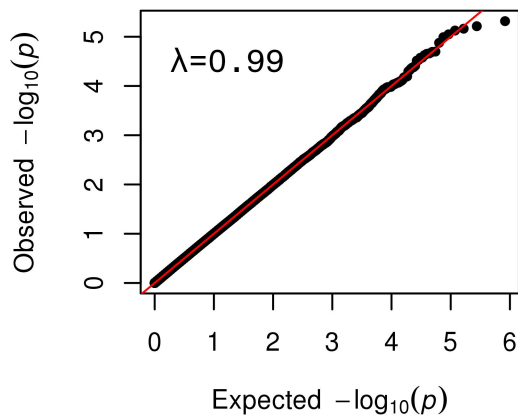



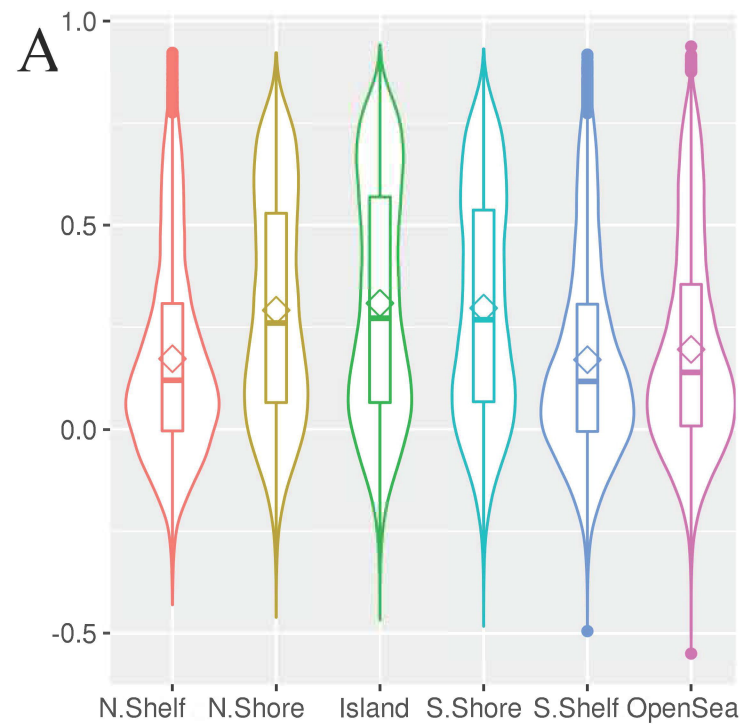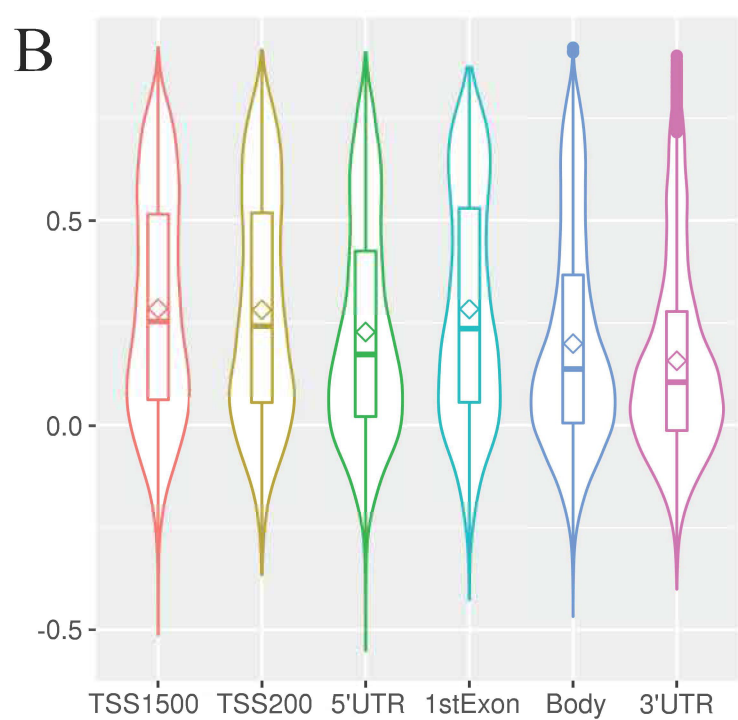

Source: https://www.biorxiv.org/content/10.1101/2020.03.24.005264v1.full.pdf
